# Supplementary material for: Identification and validation of a 7-genes prognostic signature for adult acute myeloid leukemia base on aging-related genes
Source: publisher site journal article supplement (doi:10.18632/aging.204843), 2023-06-26
Supplement: Supplementary file [file aging-v15i12-204843-supplementary-material-SD1.pdf]

**SUPPLEMENTARY FIGURES**

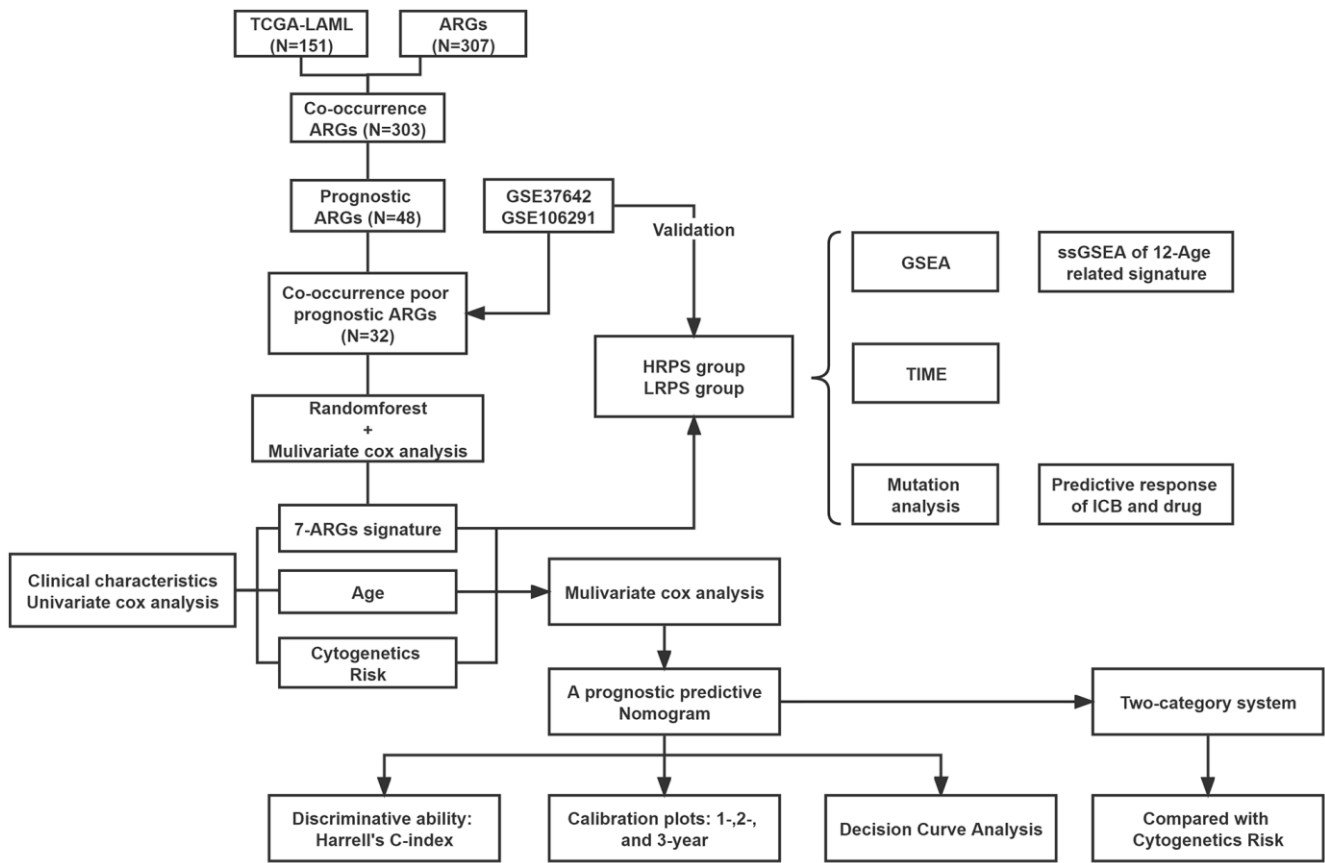

**Supplementary Figure 1. Work flow of the current study.** ARGs indicated aging-related genes. TIME indicated immune microenvironment of tumor.

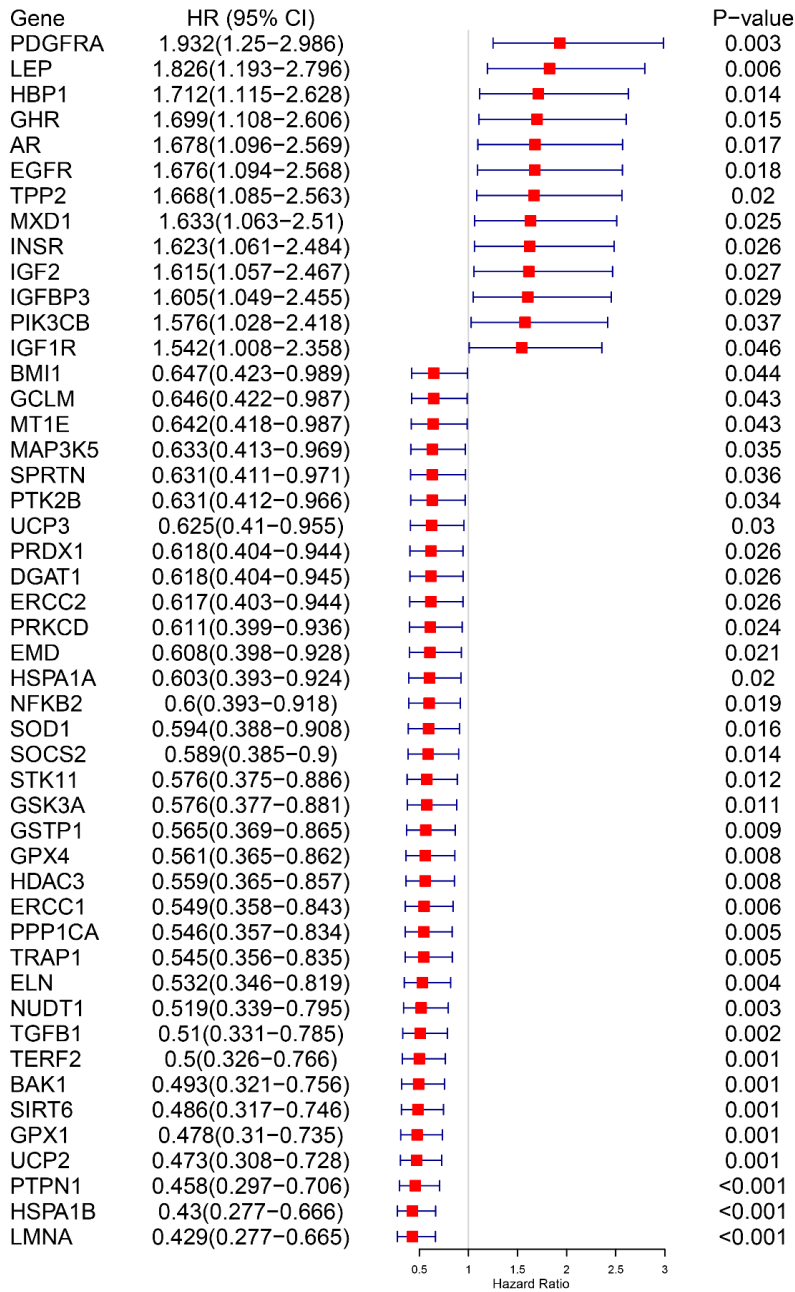

**Supplementary Figure 2. Prognostic analyses of 84 ARGs in training cohort.** Median expression values of genes were used as the threshold values, and patients with high value than which were set as a reference group.

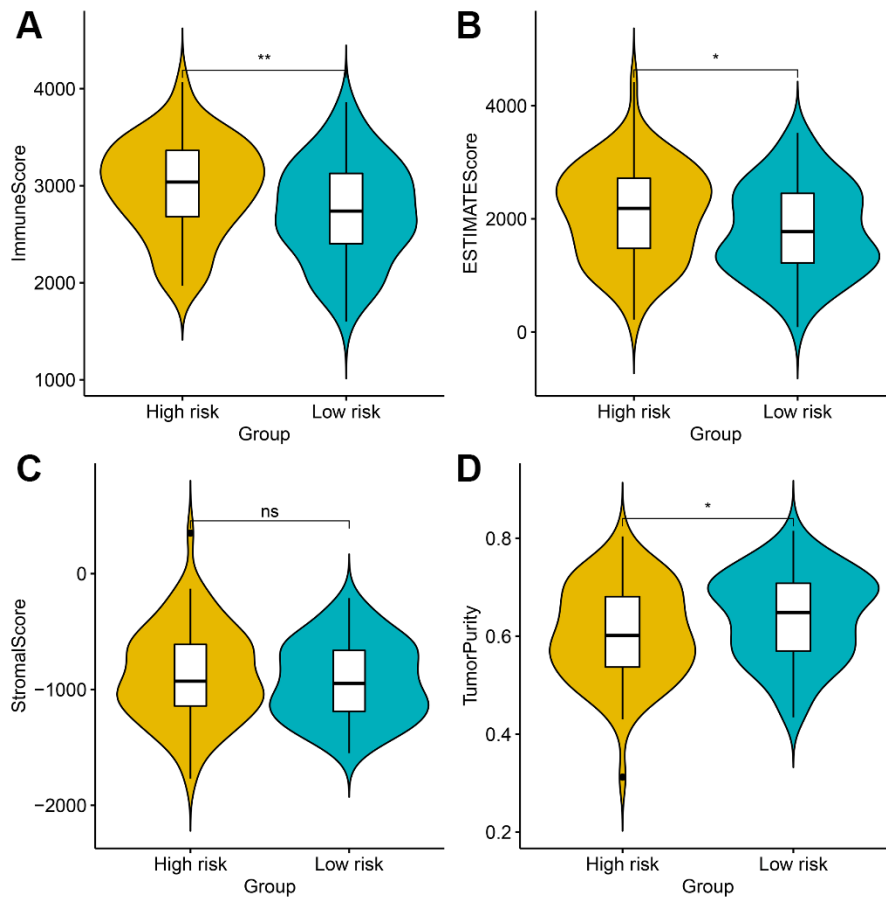

**Supplementary Figure 3. Characteristics of immune-related microenvironment in HRPS-group/high-risk group and LRPS-group/low-risk group. (A) Immune Scores. (B) ESTIMATE Scores. (C) Stromal scores. (D) Tumor Purity. (\*P < 0.05, \*\*P < 0.01, \*\*\*P < 0.001).**

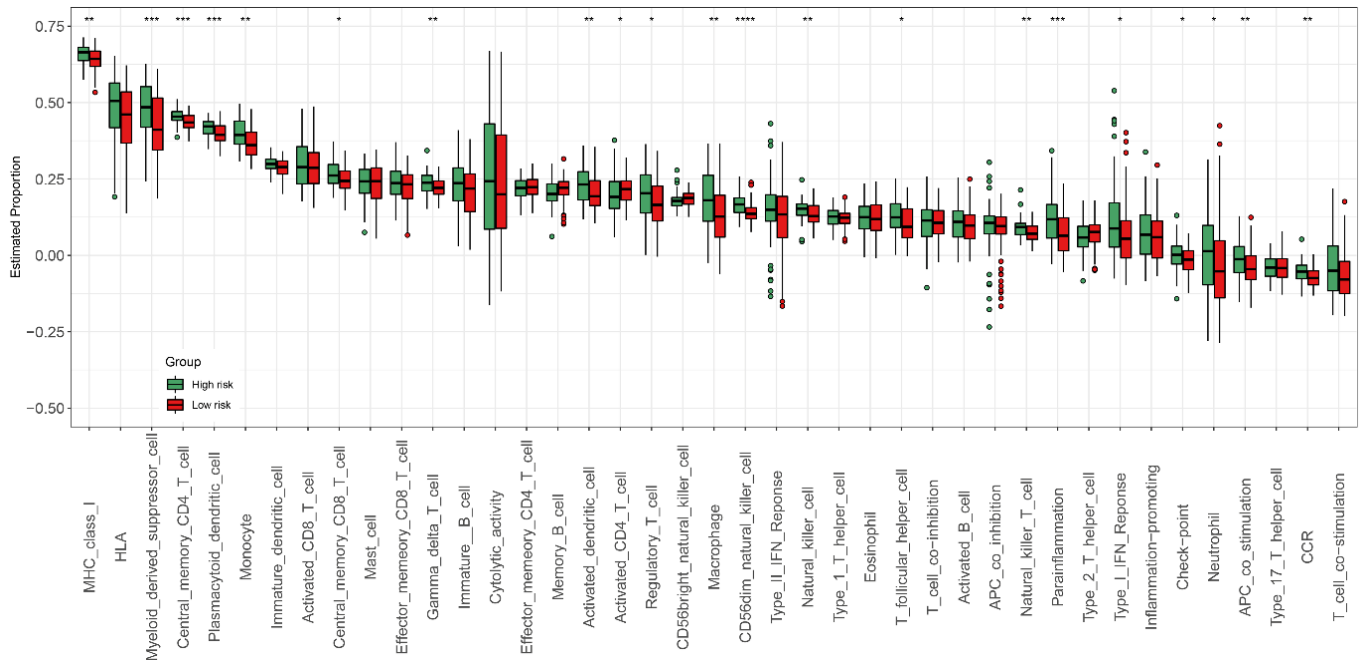

**Supplementary Figure 4. Different cell abundance of forty-one immune categories between HRPS-group/high-risk group and LRPS-group/low-risk group. (\*P < 0.05, \*\*P < 0.01, \*\*\*P < 0.001).**

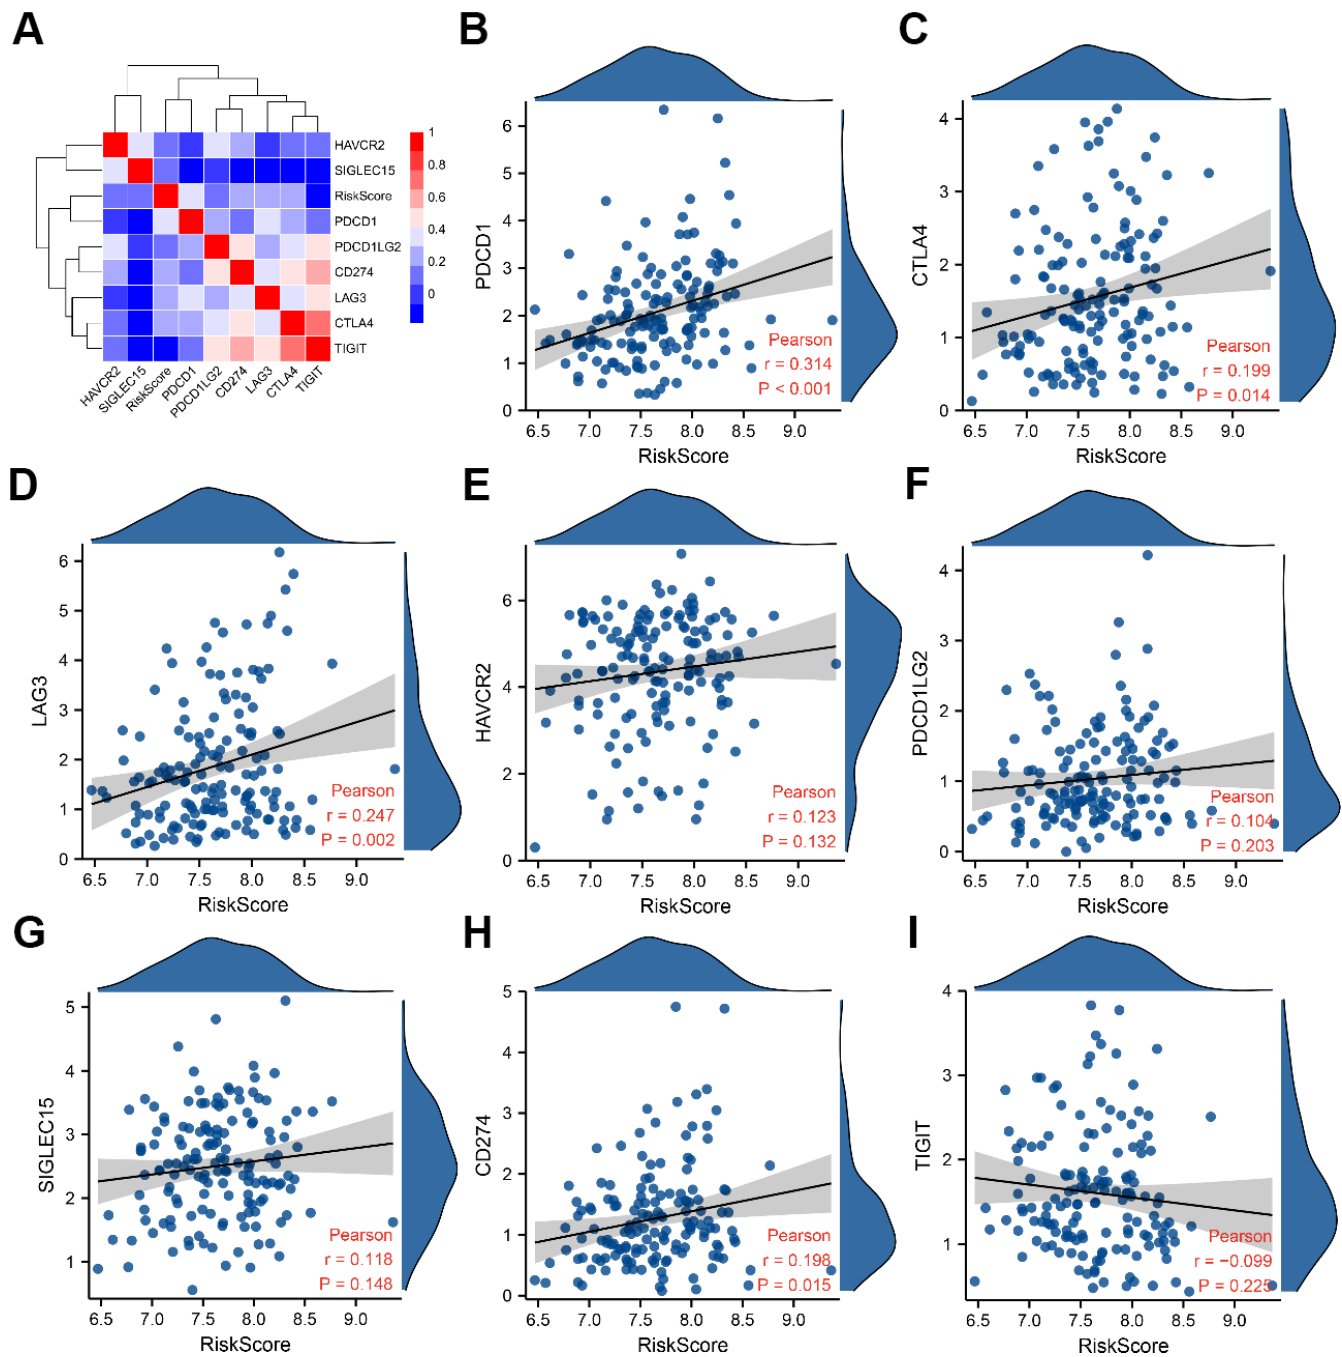

**Supplementary Figure 5. Relationship between PRS and 8 checkpoints' expression.** (A) The heatmap of correlation between PRS score and 8 immune checkpoint expression levels. (B–I) Scatter plot of correlation between PRS score and expression level of each immune checkpoint.

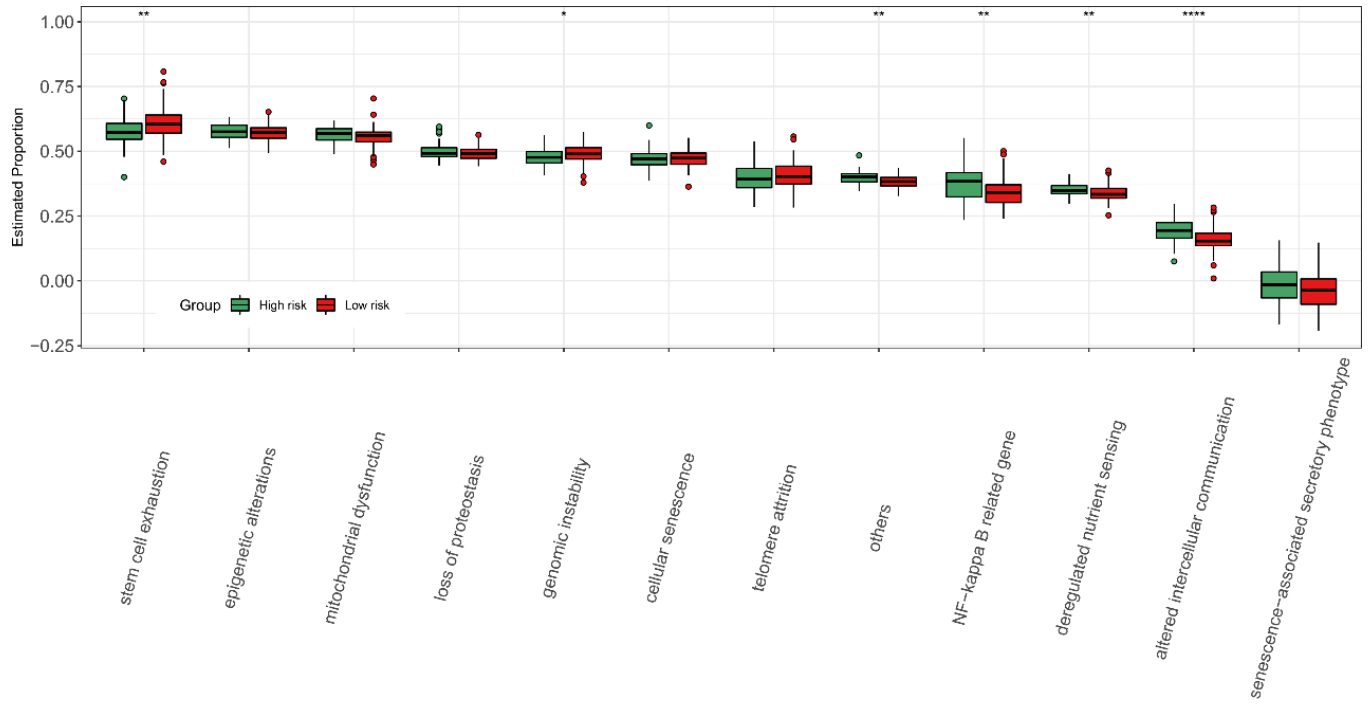

Supplementary Figure 6. Difference of ssGSEA scores about 12 aging-related gene signals between two different PRS groups according to ARGs prognostic signature. (\*P < 0.05, \*\*P < 0.01, \*\*\*P < 0.001).

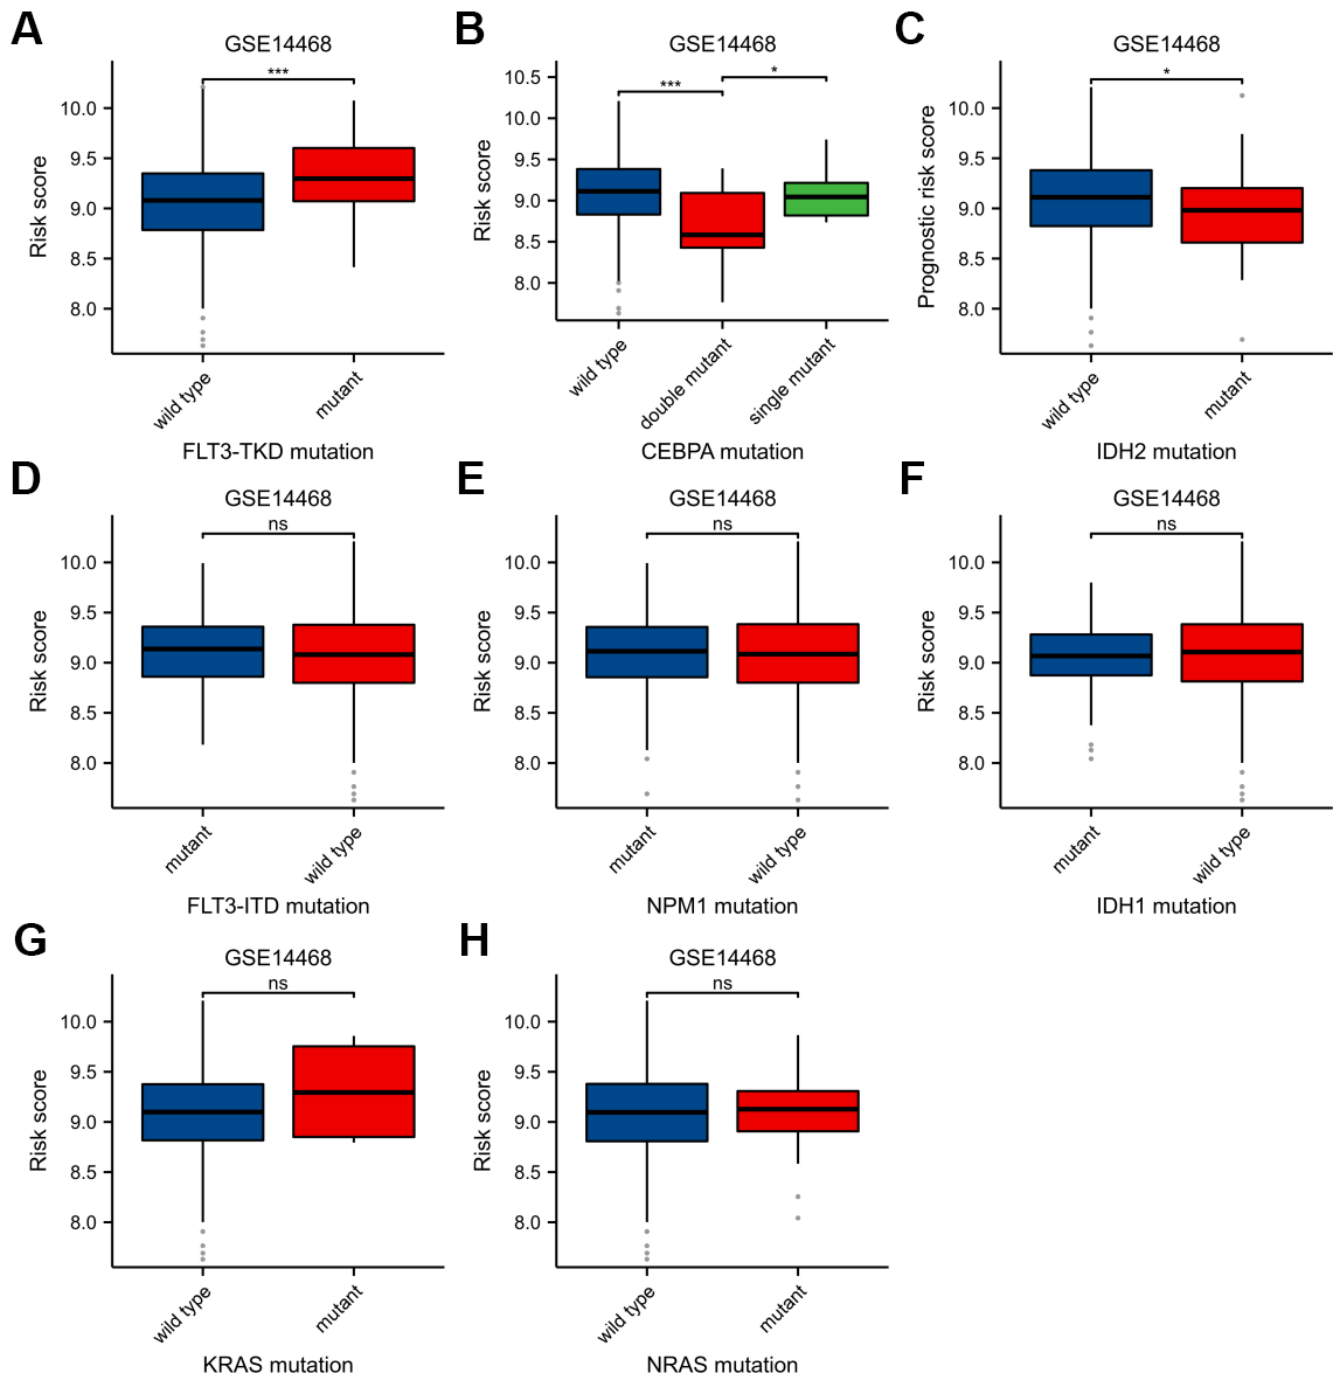

**Supplementary Figure 7. Differences of PRS between wild-type and mutation of several common genes. (A) *FLT3-TKD*, (B) *CEBPA*, (C) *IDH2*, (D) *FLT3-ITD*, (E) *NPM1*, (F) *IDH1*, (G) *KRAS*, (H) *NRAS*. (\* $P < 0.05$ , \*\* $P < 0.01$ , \*\*\* $P < 0.001$ ).**
