# Supplementary material for: Identification and validation of a 7-genes prognostic signature for adult acute myeloid leukemia base on aging-related genes
Source: publisher site journal article supplement (doi:10.18632/aging.204843), 2023-06-26
Supplement: Supplementary file [file aging-v15i12-204843-supplementary-material-SD8.pdf]

**Supplementary Table 7. Pearson correlation analysis for scanning candidate therapeutic drugs.**

| <b>Drug</b>          | <b>Correlation coefficient</b> | <b>P value</b> |
|----------------------|--------------------------------|----------------|
| Temozolomide_1375    | -0.498212053                   | 7.55E-11       |
| PF-4708671_1129      | -0.456825471                   | 3.73E-09       |
| Dactolisib_1057      | -0.449715456                   | 6.92E-09       |
| 5-Fluorouracil_1073  | -0.433863895                   | 2.62E-08       |
| Entospletinib_1630   | -0.431496025                   | 3.18E-08       |
| GNE-317_1926         | -0.428702113                   | 3.98E-08       |
| Docetaxel_1007       | -0.422628101                   | 6.46E-08       |
| Buparlisib_1873      | -0.404751894                   | 0.000000254    |
| Pictilisib_1058      | -0.401218856                   | 0.00000033     |
| VE821_2111           | -0.398435368                   | 0.000000405    |
| MK-1775_1179         | -0.384249796                   | 0.00000111     |
| AZD6738_1917         | -0.383087068                   | 0.0000012      |
| Ribociclib_1632      | -0.378656045                   | 0.00000163     |
| I-BRD9_1928          | -0.378593752                   | 0.00000164     |
| Epirubicin_1511      | -0.374221827                   | 0.00000221     |
| Axitinib_1021        | -0.371145192                   | 0.00000271     |
| Bortezomib_1191      | -0.366131208                   | 0.00000378     |
| YK-4-279_1239        | -0.365077256                   | 0.00000405     |
| BDP-00009066_1866    | -0.361748895                   | 0.00000502     |
| Camptothecin_1003    | -0.357320265                   | 0.00000667     |
| Dabrafenib_1373      | -0.351902382                   | 0.00000938     |
| BMS-345541_1249      | -0.347824221                   | 0.0000121      |
| LGK974_1598          | -0.347573101                   | 0.0000123      |
| Pevonedistat_1529    | -0.346222958                   | 0.0000133      |
| Rapamycin_1084       | -0.344928758                   | 0.0000144      |
| Luminespib_1559      | -0.327708687                   | 0.00004        |
| BMS-536924_1091      | -0.32390617                    | 0.0000497      |
| Leflunomide_1578     | -0.321775903                   | 0.000056       |
| Wnt-C59_1622         | -0.315870815                   | 0.0000779      |
| Dihydrorotenone_1827 | -0.314568802                   | 0.0000836      |
| OTX015_1626          | -0.31079521                    | 0.000102746    |
| Wee1 Inhibitor_1046  | -0.309397471                   | 0.000110801    |
| Palbociclib_1054     | -0.305193518                   | 0.000138723    |
| Ulixertinib_2047     | -0.305018131                   | 0.000140019    |
| Taselisib_1561       | -0.304662036                   | 0.000142686    |
| Sinularin_1838       | -0.304160416                   | 0.000146524    |
| Vincristine_1818     | -0.301715921                   | 0.000166641    |
